# Supplementary material for: Hotspots and frontiers in PSMA research for prostate cancer: a bibliometric and visualization analysis over the past 20 years
Source: Springer Nature journal article supplement (doi:10.1186/s40001-023-01590-w), 2023-12-19
Supplement: MOESM1 [file 26547246]

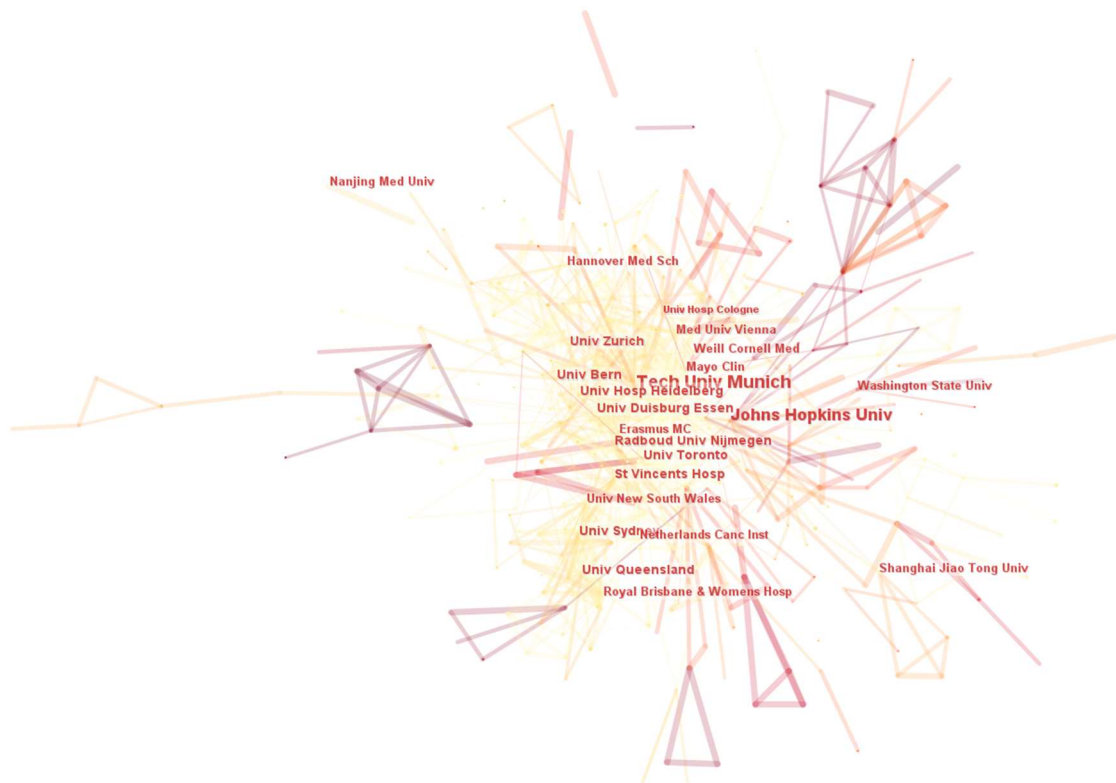

**Additional file 1 Figure S2 The institutional cooperation map created with Citespace.**

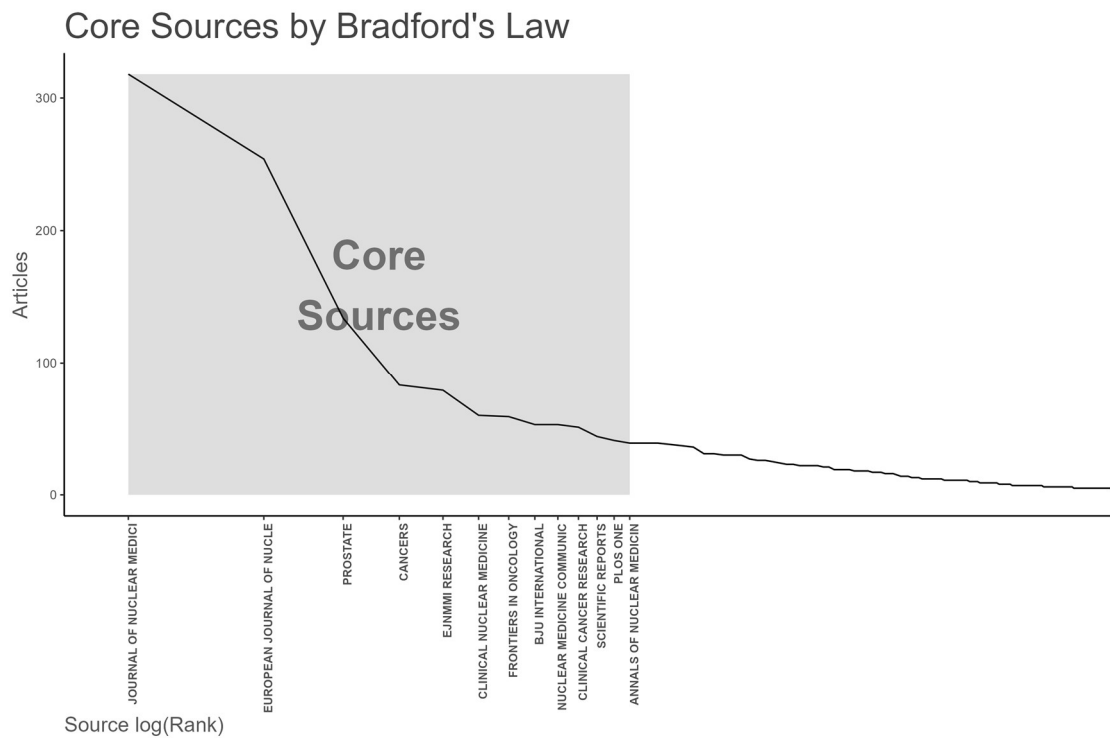

**Additional file 1 Figure S3 The core resource classified by Bradford Law generated by R software.**

**Additional file 1 Table S1** Top 10 productive countries/regions in PSMA-related prostate cancer research

| Rank | Country     | Number | Percentage | Total Citations | Average Article Citations | H-index |
|------|-------------|--------|------------|-----------------|---------------------------|---------|
| 1    | USA         | 997    | 26.03%     | 53167           | 52.85                     | 110     |
| 2    | Germany     | 658    | 17.18%     | 29520           | 43.22                     | 87      |
| 3    | China       | 343    | 8.96%      | 4671            | 12.73                     | 35      |
| 4    | Australia   | 188    | 4.91%      | 7279            | 37.14                     | 43      |
| 5    | Italy       | 150    | 3.92%      | 2213            | 13.92                     | 25      |
| 6    | Netherlands | 140    | 3.66%      | 2508            | 17.06                     | 29      |
| 7    | India       | 118    | 3.08%      | 1213            | 9.94                      | 18      |
| 8    | Turkey      | 112    | 2.92%      | 1185            | 10.39                     | 18      |
| 9    | Canada      | 97     | 2.53%      | 1966            | 18.55                     | 25      |
| 10   | Switzerland | 83     | 2.17%      | 1898            | 22.07                     | 26      |

**Additional file 1 Table S2** The 10 most productive institutions in PSMA-related prostate cancer research

| Rank | Organization                            | Documents | Citations | Total Link Strength | Country   |
|------|-----------------------------------------|-----------|-----------|---------------------|-----------|
| 1    | Technical University of Munich          | 190       | 11328     | 142                 | Germany   |
| 2    | Johns Hopkins University                | 149       | 4788      | 35                  | USA       |
| 3    | German Cancer Research Center           | 132       | 10723     | 110                 | Germany   |
| 4    | University of California, Los Angeles   | 122       | 6105      | 121                 | USA       |
| 5    | Memorial Sloan Kettering Cancer Center  | 115       | 7290      | 64                  | USA       |
| 6    | German Cancer Consortium                | 86        | 2398      | 114                 | Germany   |
| 7    | University of Freiburg                  | 82        | 2211      | 67                  | Germany   |
| 8    | University of Duisburg-Essen            | 76        | 2500      | 92                  | Germany   |
| 9    | The University of Melbourne             | 75        | 3423      | 68                  | Australia |
| 10   | University of California, San Francisco | 67        | 3824      | 62                  | USA       |
